# Supplementary material for: The Association between Plant-Based Diets and Dietary Patterns with Cardiometabolic Risk in a Sample of Commercial Taxi Drivers in South Africa
Source: MDPI journal article supplement (doi:10.3390/nu15071789), 2023-04-06
Supplement: s1 [file s1]

**Table S1.** Classification of food items by food groups

| Food groups    | Food items                                                                                                                                                                                                                                                                                                                                                                                                                                                                                                                                                                                                                                                                                                                                                                                        | Scoring system                                                                                                  |
|----------------|---------------------------------------------------------------------------------------------------------------------------------------------------------------------------------------------------------------------------------------------------------------------------------------------------------------------------------------------------------------------------------------------------------------------------------------------------------------------------------------------------------------------------------------------------------------------------------------------------------------------------------------------------------------------------------------------------------------------------------------------------------------------------------------------------|-----------------------------------------------------------------------------------------------------------------|
| Whole grains   | whole grain oat & multigrain cereal; wheat bran breakfast cereal; muesli cereal; whole-grain wheat breakfast cereal; oatmeal (cooked); brown bread; whole wheat rolls                                                                                                                                                                                                                                                                                                                                                                                                                                                                                                                                                                                                                             | <p>HEALTHY PLANT FOODS</p> <p>PDI: positive scores</p> <p>hPDI: positive scores</p> <p>uPDI: reverse scores</p> |
| Fruits         | apple; avocado; banana; grape; mango (achar) peach; pear; pineapple; raspberry; fruit salad, fresh, without sugar (melon, orange, banana)                                                                                                                                                                                                                                                                                                                                                                                                                                                                                                                                                                                                                                                         |                                                                                                                 |
| Vegetables     | mushroom (boiled); squash, butternut, (boiled, with sugar); broccoli (boiled); onion rings, breaded (fried); tomato sauce; tomato (raw); tomato, (fried in animal fat); lettuce (raw); cabbage (boiled); spinach (small leaved), boiled (USA); salad: French (lettuce, tomato, cucumber, no dressing); salad: mixed fresh vegetables (carrot, tomato, lettuce, no dressing); salad: coleslaw, commercial (USA); salad: Greek (lettuce, tomato, cucumber, olive, feta, no dressing); (salad: sweetcorn (mayonnaise, tomato, onion); (salad: sambal (tomato, onion); mixed vegetables, frozen, boiled (carrot, corn, peas, green beans, etc.); mixed vegetables, boiled, with polyunsaturated margarine (carrot, etc.); other vegetable (boiled); Soup, minestrone, commercial, prepared with water |                                                                                                                 |
| Nuts           | Peanuts (roasted, salted); Peanut butter                                                                                                                                                                                                                                                                                                                                                                                                                                                                                                                                                                                                                                                                                                                                                          |                                                                                                                 |
| Legumes        | Beans, dried, canned in tomato sauce (baked beans) (USA); <u>Mixed dishes</u> : Somp and beans; Biryani with sun oil (rice, lentils, spices, no potato, no meat)                                                                                                                                                                                                                                                                                                                                                                                                                                                                                                                                                                                                                                  |                                                                                                                 |
| Tea and coffee | Tea, brewed (USA); Tea, herb, brewed (USA); Tea, rooibos, brewed; Coffee, brewed/instant (USA); Cream, fresh, coffee (12% fat) (USA); Malted milk beverage (FF, no sugar), e.g., Milo                                                                                                                                                                                                                                                                                                                                                                                                                                                                                                                                                                                                             |                                                                                                                 |
| Refined grains | White bread; white bread flour (fortified); white rolls (fortified); Maize meal, super, porridge, stiff (white, unfortified); Maize meal, special, porridge, crumbly (white, unfortified); Baby cereal, mabele soft porridge, 6 months, original flavour (with added nutrients), dry; Ace Instant Porridge, Original Flavour (with added nutrients), dry cereal; corn breakfast cereal, plain; Breakfast cereal - Frosties, sugar-coated cornflakes; Breakfast cereal - Weet-bix; Breakfast cereal - puffed wheat, plain (USA); Rice, white, cooked (USA); Rice, white, cooked, with sun oil; Macaroni/Spaghetti, cooked (USA); Maize, samp/rice, cooked (white); <u>Mixed dish</u> : Somp and beans; Muffin, plain (UK); Cookies, commercial, plain; Vetkoek, home-made                          | <p>LESS HEALTHY PLANT FOODS</p>                                                                                 |

|                     |                                                                                                                                                                                                                                                                                                                                                                       |                                                                                                             |
|---------------------|-----------------------------------------------------------------------------------------------------------------------------------------------------------------------------------------------------------------------------------------------------------------------------------------------------------------------------------------------------------------------|-------------------------------------------------------------------------------------------------------------|
|                     | (cake flour, water); Roti, made with sun oil; Snack, savoury, average, e.g. Niknaks, Fritos, Ghost Pops                                                                                                                                                                                                                                                               | PDI: positive scores<br><br>hPDI: reverse scores<br><br>uPDI: positive scores                               |
| Potatoes            | Potato, boiled without skin; Potato chips/French fries, fried in sunflower oil (USA); Potato chips/French fries, frozen, heated in oven (USA); Snack, savoury, Chipniks; Snack, savoury, potato crisps/chips                                                                                                                                                          |                                                                                                             |
| Fruit juices        | apple juice; grapefruit juice (canned, sweetened); grapefruit juice; orange juice (canned, sweetened); orange juice; peach juice; peach and orange juice                                                                                                                                                                                                              |                                                                                                             |
| SSB                 | Sugar, brown (USA); Score energy drink; Cold drink, Lucozade (UK); Cold drink, low-cal/artificially sweetened/diet squash, diluted (USA); Cold drink, squash, diluted; Cold drink, carbonated, average (e.g. Cola, Cream Soda, Tonic) (USA)                                                                                                                           |                                                                                                             |
| Sweets and desserts | Sweets, fruit gum; Sweets, chewing gum; Sweets, peanut brittle (USA); Sweets, chocolate coated bar (UK); Sweets, chocolate, dark/bittersweet/Albany; Sweets, fudge/toffee/caramel; Scone, plain (FF, sun oil); Cookies, commercial, plain; Scone, plain (WM, HM); Pudding, dumplings (HM)                                                                             |                                                                                                             |
| Animal fat          | Medium-fat spread, polyunsaturated; Floro light, Margarine, 50% polyunsaturated; Floro, Low-fat spread, polyunsaturated; Floro extra light, Medium-fat spread, <40% polyunsaturated; Margarine, brick/hard; Butter                                                                                                                                                    | ANIMAL FOODS<br><br><br><br><br>PDI: reverse scores<br><br>hPDI: reverse scores<br><br>uPDI: reverse scores |
| Egg                 | Egg, scrambled (LFM, sun oil); Egg, fried in sun oil; Egg, chicken, whole, boiled/poached                                                                                                                                                                                                                                                                             |                                                                                                             |
| Dairy               | Maas/Sour milk, full fat; Milk, full fat/whole, fresh; Cheese, processed, full fat (UK); Cheese, processed, cheddar, high fat; Cheese, cheddar, high fat; Cheese, cheddar, white, high fat; Yoghurt, fruit, fat free, artificially sweetened (UK); Yoghurt, drinking, low fat, flavoured, sweetened (UK); Milk shake, vanilla, purchased (USA); Dairy-fruit juice mix |                                                                                                             |
| Fish or seafood     | Pilchard in tomato sauce (UK); Tuna salad (USA); Fish, low fat, battered/crumbed, fried in sun oil; Fish, medium fat, battered/crumbed, fried in sun oil                                                                                                                                                                                                              |                                                                                                             |
| Meat                | Beef, brisket / regular mince, cooked – moist; Beef, loin, cooked – dry; Beef, chuck, cooked – moist; Beef, thick flank, cooked – moist; Beef, rib, wing, cooked – dry; Beef, rump, cooked – dry; Beef, mince (lean), savoury (tomato, onion); Biltong, beef (cured, dried) (USA); Chicken, meat only, frozen, boiled; Chicken, meat only, frozen, roasted;           |                                                                                                             |

|                            |                                                                                                                                                                                                                                                                                                                                                                                                                                                                                                                                                                                                                                                                                                                                                                                                                                                                                                                                                                                                                                                                                                                                                                                                                                                                                                                                                                                                                                                                                                                                                                                                                                                                                                                                                                                                                                                                                                                                                                                                                                                                                                      |  |
|----------------------------|------------------------------------------------------------------------------------------------------------------------------------------------------------------------------------------------------------------------------------------------------------------------------------------------------------------------------------------------------------------------------------------------------------------------------------------------------------------------------------------------------------------------------------------------------------------------------------------------------------------------------------------------------------------------------------------------------------------------------------------------------------------------------------------------------------------------------------------------------------------------------------------------------------------------------------------------------------------------------------------------------------------------------------------------------------------------------------------------------------------------------------------------------------------------------------------------------------------------------------------------------------------------------------------------------------------------------------------------------------------------------------------------------------------------------------------------------------------------------------------------------------------------------------------------------------------------------------------------------------------------------------------------------------------------------------------------------------------------------------------------------------------------------------------------------------------------------------------------------------------------------------------------------------------------------------------------------------------------------------------------------------------------------------------------------------------------------------------------------|--|
|                            | <p>Chicken, skin, fresh, cooked – moist; Chicken, meat and skin, frozen, boiled; Chicken, white meat, fresh, cooked – moist; Chicken, white meat, frozen, cooked – dry; Chicken, white meat, frozen, cooked – moist; Chicken, dark meat, fresh, cooked – dry; Chicken, dark meat, frozen, cooked – dry; Chicken, dark meat, frozen, cooked – moist; Chicken, batter dipped, fried (e.g. Kentucky) (USA); Chicken, giblets, curried; Chicken, giblets, cooked (simmered) (USA); Bacon, cured, pan-fried/grilled (USA); Pork, loin, grilled (chop) (USA); Schnitzel, pork chop (crumbed); Spaghetti bolognaise (lean mince); Stomach, lamb, cooked; Liver, chicken, cooked (simmered) (USA); Luncheon meat, beef / pork (USA); Meatball (lean mince, with egg); Mutton, leg (meat and fat), roasted (USA); Mutton, rib, grilled/roasted (USA); Offal, cooked (tripe / brawn / brain / tongue); Oxtail, stewed (meat only, salt added) (UK); Patty, beef, frozen, grilled (USA); Patty, chicken, crumbed / breaded, fried (USA); Polony / Bologna, beef and pork (USA); Sausage, smoked, beef and pork (USA); Sausage, beef &amp; pork / boerewors, grilled (USA); Sausage, beef, grilled (UK); Sausage, beef, dry (UK); Salami, beef / pork (also Russians) (USA); Sausage roll, commercial, baked; Vienna sausage, beef and pork, canned (USA); <u>Mixed dishes</u>: Beef, stew, with cabbage; Beef, stew, with vegetables; Chicken (with skin), stew, tomato and onion; Chicken (with skin), stew, with vegetables; Chicken (with skin), curry; Chicken (without skin), curry; Mutton, curry; Mutton, stew, with vegetables; Mutton stew, with green beans; Pie, steak and kidney, commercial, baked; Samosa, with mutton filling (UK); Spread (sandwich), pork / beef (USA); Soup, soup mix (with beef and vegetables); Soup, chicken cream, commercial, prepared with water; Soup, vegetable and beef, commercial, prepared with water; Soup, pea, split (with pork and vegetables); Soup, bean, dried (with beef and vegetables); Soup, chicken noodle, commercial, prepared with water (USA)</p> |  |
| Miscellaneous animal foods | <p>Gravy, brown, powder, prepared with water (USA); Gravy, meat (fat-free stock, vegetables, thickened); Gravy, meat (20% fat, stock, thickened); Salad dressing, mayonnaise; Salad dressing, salad cream; Soup, asparagus cream, commercial, prepared with water</p>                                                                                                                                                                                                                                                                                                                                                                                                                                                                                                                                                                                                                                                                                                                                                                                                                                                                                                                                                                                                                                                                                                                                                                                                                                                                                                                                                                                                                                                                                                                                                                                                                                                                                                                                                                                                                                |  |

**Table S2.** Characteristics of the commercial taxi drivers by study area

| Parameters                           | Bellville  | Cape Town  | <i>p</i> -value  |
|--------------------------------------|------------|------------|------------------|
| <b>Sociodemographic risk factors</b> |            |            |                  |
| Age in years                         | 35 (30;43) | 43 (35;50) | <b>&lt;0.001</b> |
| Education, n (%)                     |            |            |                  |
| No schooling                         | 7 (6)      | 0 (0)      |                  |
| Attended primary school              | 24 (22)    | 31 (40)    |                  |
| Attended high school                 | 37 (47)    | 54 (49)    | <b>0.007</b>     |
| Matriculated (Grade 12)              | 22 (20)    | 10 (13)    |                  |
| Diploma                              | 4 (4)      | 0 (0)      |                  |
| Marital status, n (%)                |            |            |                  |
| Single/separated/divorced            | 55 (50)    | 35 (45)    |                  |
| Married/living as married            | 56 (50)    | 43 (55)    | 0.526            |
| <b>Behavioural risk factors</b>      |            |            |                  |
| Current smoker, n (%)                | 54 (49)    | 29 (38)    | 0.136            |
| Current alcohol drinker, n (%)       | 66 (60)    | 36 (46)    | 0.071            |
| <b>Cardiometabolic risk factors</b>  |            |            |                  |
| Hypertension, n (%)                  | 35 (33)    | 39 (50)    | <b>0.020</b>     |
| Dysglycaemia, n (%)                  | 22 (20)    | 21 (27)    | 0.251            |
| Low HDL-C, n (%)                     | 51 (46)    | 24 (31)    | <b>0.036</b>     |
| Raised LDL-C, n (%)                  | 42 (38)    | 28 (36)    | 0.786            |
| Raised TG, n (%)                     | 25 (23)    | 26 (33)    | 0.099            |
| Obesity, n (%)                       | 35 (32)    | 34 (44)    | 0.090            |
| Subclinical inflammation, n (%)      | 30 (27)    | 27 (35)    | 0.263            |

Data presented as counts and percentages or median (25<sup>th</sup> percentile;75<sup>th</sup> percentile). *p*-values with bold text are statistically significant, level of significance set at less than 0.05. Hypertension: SBP ≥ 140 mmHg and/or DBP ≥ 90 mmHg, Dysglycaemia: FBG ≥ 7.0 mmol/L, Low HDL-C: levels ≤ 1.0 mmol/L, Raised LDL-C: levels ≥ 3.0 mmol/L, Raised TG: levels ≥ 1.5 mmol/L, Obesity: BMI ≥ 30 kg/m<sup>2</sup>, subclinical inflammation: hs-CRP between 3.0 and 10.0 mg/L.

**Table S3.** Prevalence of PBDs according to study area

| Parameters                                             | Overall | Bellville  | Cape Town  | <i>p</i> -value |
|--------------------------------------------------------|---------|------------|------------|-----------------|
| <b>PDI</b>                                             |         |            |            |                 |
| Observed range                                         | 22-35   | 22-34      | 23-35      |                 |
| Median (25 <sup>th</sup> ;75 <sup>th</sup> percentile) |         | 26 (25;28) | 27 (25;28) | 0.094           |
| Tertile 1, n (%)                                       |         | 51 (54)    | 33 (44)    |                 |
| Tertile 2, n (%)                                       |         | 28 (30)    | 25 (34)    | 0.427           |
| Tertile 3, n (%)                                       |         | 15 (16)    | 16 (22)    |                 |
| <b>hPDI</b>                                            |         |            |            |                 |
| Observed range                                         | 23-38   | 24-38      | 23-36      |                 |
| Median (25 <sup>th</sup> ;75 <sup>th</sup> percentile) |         | 30 (27;31) | 29 (27;31) | 0.535           |
| Tertile 1, n (%)                                       |         | 34 (36)    | 35 (47)    |                 |
| Tertile 2, n (%)                                       |         | 39 (42)    | 22 (30)    | 0.243           |
| Tertile 3, n (%)                                       |         | 21 (22)    | 17 (23)    |                 |
| <b>uPDI</b>                                            |         |            |            |                 |
| Observed range                                         | 25-39   | 25-37      | 25-39      |                 |
| Median (25 <sup>th</sup> ;75 <sup>th</sup> percentile) |         | 32 (31;34) | 33 (31-35) | 0.337           |
| Tertile 1, n (%)                                       |         | 31 (34)    | 27 (37)    |                 |
| Tertile 2, n (%)                                       |         | 49 (53)    | 25 (35)    | <b>0.021</b>    |
| Tertile 3, n (%)                                       |         | 12 (13)    | 20 (28)    |                 |

Data presented as counts and percentages or median [25<sup>th</sup> percentile;75<sup>th</sup> percentile]. *p*-values with bold text are statistically significant, level of significance set at less than 0.05. PDI: overall plant-based diet index. hPDI: healthy plant-based diet index. uPDI: unhealthy plant-based diet index.
